# Supplementary material for: Differentially Expressed Genes of Natural Killer Cells Can Distinguish Rheumatoid Arthritis Patients from Healthy Controls
Source: PubMed Central journal article supplement (PMC7290970; doi:10.3390/genes11050492), 2020-04-30
Supplement: genes-11-00492-s001.pdf [file genes-11-00492-s001.pdf]

## Supplementary Tables and Figures

Table S1. List of primers for assessment of gene expression using real time qPCR.

| Gene Name | Primer Sequence                                         | Amplicon Size (bp) |
|-----------|---------------------------------------------------------|--------------------|
| CXCL10    | F: AAGGAATCTTTCTGCTTTGG<br>R: ACCTTCCTGTATGTGTTTGG      | 184                |
| RELA      | F: TAGAAGAGCAGCGTGGGGA<br>R: AGAGTTTCGGTTCACCTCGGC      | 176                |
| CCL2      | F: CAGCCAGATGCAATCAATGCC<br>R: TGGAATCCTGAACCCACTTCT    | 190                |
| CCR4      | F: GAAAGTATCCCCAAGCCTTGC<br>R: AAGGGAGGGAAAACACGAAGA    | 214                |
| IBTK      | F: AAGTCTGGTAAGACCAATTCTGTG<br>R: CGGTTTGACTTTCGCCTCAAT | 156                |
| ITGB7     | F: GTGGAAACTAAAGCCCAGAGAG<br>R: CCGAGATCCCAAGCCGTAG     | 122                |
| CKLF      | F: TATCACTGGATTTGAAGTCACCG<br>R: GCCAACACAGATACGATGAGC  | 153                |
| PECAM-1   | F: CCCAGCCCAGGATTTCTTAT<br>R: ACCGCAGGATCATTGAGTT       | 163                |
| CXCL16    | F: CCCGCCATCGGTTCAAGTTC<br>R: CCCCAGTAAGCATGTCCAC       | 181                |
| TLR3      | F: GTCCCAAGCCTTCAACGACT<br>R: GTTTGCGTGTTCAGAGCC        | 216                |
| BTK       | F: GCTCAAAAACGTAATCCGGTACA<br>R: GTCTTCCGGTGAGAACTCCC   | 171                |
| ICAM1     | F: GGTAGCAGCCGAGTCATAA<br>R: GATAGGTTCAAGGAGGCGTG       | 149                |
| TLR10     | F: GATTACTCTGGGACGACCTTTT<br>R: GTCAAGATAAGCCTTACCACCAA | 108                |
| IL1B      | F: AGCTACGAATCTCCGACCAC<br>R: CGTTATCCCATGTGTCGAAGAA    | 186                |
| IL12RB2   | F: AGGACGAGACACCCACTTATAC<br>R: ATTGACAGCAGTAACCTTGGC   | 172                |
| CXCR6     | F: ATGTGTTCTGGTGAACCTA<br>R: GGCCTTAACCACTACAATGA       | 203                |
| CXCR2     | F: GACAAATCTCCACCTTCAGA<br>R: ATGAAACAACCTTGACGATG      | 224                |
| CXCR1     | F: TGGGGACTGTCTATGAATCTGT<br>R: GCAACACCATCCGCCATTTT    | 127                |
| CD56      | F: TGTCCGATTCATAGTCTGTCC<br>R: CTCACAGCGATAAGTGCCCTC    | 82                 |

*Table S2. Summary of Clinical Data of Recruited Healthy Controls and RA Patients*

WBC: White blood cells, RBC: red blood cells, HCT: Hematocrit, MCV: mean corpuscular volume, MCH: mean corpuscular hemoglobin, MCHC: mean corpuscular hemoglobin concentration, RDW: red blood cell distribution width, MPV: mean platelet volume, PDW: platelet distribution width, HbA1c: Hemoglobin A1c, GFR: Glomerular filtration rate, HDL: high-density lipoprotein, LDL: low-density lipoprotein, TSH: Thyroid-stimulating hormone, TPO: Thyroid peroxidase, CRP: C-reactive protein, BSA: Body Surface Area, BMI: Body Mass Index, RF: Rheumatoid Factor

| Parameters              | Healthy Controls |                     |                      | Rheumatoid Arthritis Patients |                     |                     |
|-------------------------|------------------|---------------------|----------------------|-------------------------------|---------------------|---------------------|
|                         | Range            | Mean $\pm$ SD       | Mean $\pm$ SEM       | Range                         | Mean $\pm$ SD       | Mean $\pm$ SEM      |
| Age                     | 23-70            | 45.81 $\pm$ 10.07   | 45.81 $\pm$ 2.517    | 27-89                         | 53.76 $\pm$ 14.83   | 53.76 $\pm$ 3.597   |
| WBC                     | 2.61-7.84        | 5.449 $\pm$ 1.4     | 5.449 $\pm$ 0.35     | 3.87-13.86                    | 6.901 $\pm$ 2.343   | 6.901 $\pm$ 0.5684  |
| RBC                     | 4.02-5.42        | 4.639 $\pm$ 0.487   | 4.639 $\pm$ 0.1218   | 3.45-5.58                     | 4.664 $\pm$ 0.5589  | 4.664 $\pm$ 0.1356  |
| Hemoglobin              | 11.3-13.6        | 12.68 $\pm$ 0.7123  | 12.68 $\pm$ 0.1781   | 10.4-16.4                     | 12.95 $\pm$ 1.341   | 12.95 $\pm$ 0.3253  |
| HCT                     | 33.9-41.4        | 37.77 $\pm$ 1.755   | 37.77 $\pm$ 0.4388   | 32.6-49.1                     | 38.92 $\pm$ 4.027   | 38.92 $\pm$ 0.9767  |
| MCV                     | 67.6-95.7        | 82.06 $\pm$ 7.722   | 82.06 $\pm$ 1.931    | 73.1-101.5                    | 83.88 $\pm$ 6.773   | 83.88 $\pm$ 1.643   |
| MCH                     | 21.8-32.3        | 27.62 $\pm$ 3.306   | 27.62 $\pm$ 0.8265   | 23.4-34.2                     | 27.95 $\pm$ 2.666   | 27.95 $\pm$ 0.6467  |
| MCHC                    | 30.9-36.4        | 33.58 $\pm$ 1.392   | 33.58 $\pm$ 0.3481   | 31.2-35.8                     | 33.29 $\pm$ 1.134   | 33.29 $\pm$ 0.275   |
| RDW                     | 12-19.9          | 13.74 $\pm$ 1.945   | 13.74 $\pm$ 0.4862   | 12.5-20                       | 14.73 $\pm$ 1.697   | 14.73 $\pm$ 0.4116  |
| Platelet                | 189-363          | 279.9 $\pm$ 49.36   | 279.9 $\pm$ 12.34    | 191-450                       | 300.5 $\pm$ 74.45   | 300.5 $\pm$ 18.06   |
| MPV                     | 6.4-10.9         | 8.338 $\pm$ 1.079   | 8.338 $\pm$ 0.2699   | 6.7-13.5                      | 8.376 $\pm$ 1.717   | 8.376 $\pm$ 0.4164  |
| % Neutrophils           | 32-67.8          | 51.52 $\pm$ 8.479   | 51.52 $\pm$ 2.12     | 26-88.5                       | 55.5 $\pm$ 15.45    | 55.5 $\pm$ 3.746    |
| %<br>Lymphocytes        | 25-53            | 37.62 $\pm$ 7.579   | 37.62 $\pm$ 1.895    | 9.7-54.6                      | 32.85 $\pm$ 11.91   | 32.85 $\pm$ 2.889   |
| % Monocytes             | 3.4-10.1         | 5.969 $\pm$ 1.872   | 5.969 $\pm$ 0.4679   | 1.8-12.2                      | 6.029 $\pm$ 2.531   | 6.029 $\pm$ 0.6138  |
| % Eosinophils           | 0.8-6.1          | 2.925 $\pm$ 1.575   | 2.925 $\pm$ 0.3938   | 0.1-11.6                      | 3.413 $\pm$ 2.8     | 3.413 $\pm$ 0.7     |
| % Basophils             | 0.1-1.1          | 0.5313 $\pm$ 0.2983 | 0.5313 $\pm$ 0.07456 | 0.1-1.5                       | 0.5875 $\pm$ 0.3757 | 0.5875 $\pm$ 0.0939 |
| Absolute<br>Neutrophils | 1.23-4.15        | 2.84 $\pm$ 0.9821   | 2.84 $\pm$ 0.2455    | 1.43-11.04                    | 3.964 $\pm$ 2.448   | 3.964 $\pm$ 0.612   |
| Absolute<br>Lymphocytes | 1.11-2.8         | 2.012 $\pm$ 0.5409  | 2.012 $\pm$ 0.1352   | 0.76-3.79                     | 2.143 $\pm$ 0.7916  | 2.143 $\pm$ 0.1979  |
| Absolute<br>Monocytes   | 0.16-0.69        | 0.3288 $\pm$ 0.151  | 0.3288 $\pm$ 0.03775 | 0.14-0.6                      | 0.3763 $\pm$ 0.1256 | 0.3763 $\pm$ 0.0314 |
| Absolute<br>Eosinophils | 0.04-0.4         | 0.1525 $\pm$ 0.1075 | 0.1525 $\pm$ 0.02687 | 0.08-0.79                     | 0.2386 $\pm$ 0.1835 | 0.2386 $\pm$ 0.0491 |

|                        |                 |                  |                 |             |                 |                 |
|------------------------|-----------------|------------------|-----------------|-------------|-----------------|-----------------|
| <b>Absolute</b>        |                 |                  | 0.02375 ±       |             |                 |                 |
| <b>Basophils</b>       | 0.01-0.05       | 0.02375 ± 0.0115 |                 | 0.01-0.11   | 0.036 ± 0.02586 | 0.036 ± 0.00668 |
| <b>PDW</b>             | 9.4-66.9        | 41.39 ± 19.86    | 41.39 ± 4.965   | 9.7-69.4    | 40.19 ± 17.5    | 40.19 ± 4.376   |
| <b>Erythrocyte</b>     |                 |                  |                 |             |                 |                 |
| <b>Sedimentation</b>   | 6-50            | 20.69 ± 14       | 20.69 ± 3.884   | 6-80        | 33.76 ± 21.84   | 33.76 ± 5.298   |
| <b>Rate (ESR)</b>      |                 |                  |                 |             |                 |                 |
| <b>Sodium</b>          | 131-143         | 139.1 ± 3.125    | 139.1 ± 0.8351  | 132-143     | 138.5 ± 3.184   | 138.5 ± 0.7723  |
| <b>Creatinine</b>      | 43-91           | 59.5 ± 12.68     | 59.5 ± 3.17     | 31-111      | 62.59 ± 20.34   | 62.59 ± 4.933   |
| <b>Uric acid</b>       | 4.6-350         | 241.3 ± 81.8     | 241.3 ± 21.86   | 145-508     | 275.5 ± 88.64   | 275.5 ± 22.89   |
| <b>Fasting</b>         |                 |                  |                 |             |                 |                 |
| <b>Glucose</b>         | 4.9-6           | 5.375 ± 0.3732   | 5.375 ± 0.1319  | 6-8.5       | 6.9 ± 1.389     | 6.9 ± 0.8021    |
| <b>Glucose</b>         | 4-7.8           | 5.558 ± 1.039    | 5.558 ± 0.3134  | 5-29.1      | 8.121 ± 6.164   | 8.121 ± 1.647   |
| <b>HbA1c</b>           | 4.8-6           | 5.414 ± 0.414    | 5.414 ± 0.1565  | 4.9-10.4    | 6.615 ± 1.521   | 6.615 ± 0.4218  |
| <b>Urea level</b>      | 2.3-8           | 4.231 ± 1.894    | 4.231 ± 0.5253  | 2.7-9.1     | 4.724 ± 1.796   | 4.724 ± 0.4356  |
| <b>GFR</b>             | 55-119          | 101.4 ± 21.51    | 101.4 ± 7.604   | 39-186.1    | 98.88 ± 31.22   | 98.88 ± 7.805   |
| <b>Total protein</b>   | 70-92           | 78.69 ± 6.183    | 78.69 ± 1.715   | 68-85       | 75.94 ± 4.582   | 75.94 ± 1.146   |
| <b>Albumin</b>         | 33.1-45         | 38.86 ± 3.821    | 38.86 ± 1.06    | 29.2-38.9   | 34.16 ± 3.208   | 34.16 ± 0.802   |
| <b>Total Bilirubin</b> | 6.6-18.4        | 9.731 ± 3.216    | 9.731 ± 0.8919  | 4.2-14.9    | 8.606 ± 3.568   | 8.606 ± 0.8921  |
| <b>Ferritin</b>        | 10-162          | 67.88 ± 51.2     | 67.88 ± 18.1    | 9-66        | 27.9 ± 18.26    | 27.9 ± 5.774    |
| <b>Iron</b>            | 8.4-20.3        | 14.24 ± 4.837    | 14.24 ± 1.71    | 2.9-27.7    | 13.24 ± 8.423   | 13.24 ± 2.664   |
| <b>Transferrin</b>     | 211-339         | 254 ± 46.83      | 254 ± 19.12     | 216-336     | 257.2 ± 41.47   | 257.2 ± 13.11   |
| <b>Cholesterol</b>     | 3.46-7.82       | 5.344 ± 1.198    | 5.344 ± 0.3094  | 4-7.2       | 5.013 ± 0.9165  | 5.013 ± 0.2366  |
| <b>Triglycerides</b>   | 0.57-2          | 1.069 ± 0.4152   | 1.069 ± 0.1072  | 0.43-3.82   | 1.508 ± 0.9503  | 1.508 ± 0.2454  |
| <b>HDL</b>             | 0.9-1.87        | 1.424 ± 0.2761   | 1.424 ± 0.07129 | 0.95-2.11   | 1.399 ± 0.3633  | 1.399 ± 0.09379 |
| <b>LDL</b>             | 1.74-5.83       | 3.539 ± 1.179    | 3.539 ± 0.3045  | 0.26-3.64   | 2.655 ± 0.8625  | 2.655 ± 0.2227  |
| <b>Vitamin D</b>       | 30.47-<br>100.8 | 55.01 ± 19.55    | 55.01 ± 5.047   | 17.82-130.7 | 56.3 ± 32.03    | 56.3 ± 8.884    |
| <b>Complement 3</b>    | 97-196          | 137.7 ± 34.07    | 137.7 ± 13.91   | 85-202      | 153.7 ± 42.81   | 153.7 ± 17.48   |
| <b>Complement 4</b>    | 11-36           | 26 ± 8.408       | 26 ± 3.432      | 19.9-44.2   | 31.83 ± 9.008   | 31.83 ± 3.677   |
| <b>T4 free</b>         | 11.95-<br>17.46 | 15.31 ± 1.887    | 15.31 ± 0.4871  | 7.67-25.64  | 15.63 ± 4.008   | 15.63 ± 1.002   |
| <b>T3 free</b>         | 3.59-4.93       | 4.304 ± 0.5167   | 4.304 ± 0.1722  | 3.17-5.25   | 4.259 ± 0.6329  | 4.259 ± 0.2002  |
| <b>TSH</b>             | 0.66-3.29       | 1.581 ± 0.7203   | 1.581 ± 0.1801  | 0.16-10.51  | 2.56 ± 2.774    | 2.56 ± 0.6728   |
| <b>TPO Antibody</b>    | 6.6-1300        | 192.8 ± 406.3    | 192.8 ± 128.5   | 6.4-316.9   | 97.59 ± 114.8   | 97.59 ± 38.28   |

|                                     |           |                |                 |                               |                |                 |
|-------------------------------------|-----------|----------------|-----------------|-------------------------------|----------------|-----------------|
| <b>Thryoglobulin<br/>Antibody</b>   | 10-261.3  | 62.21 ± 85.43  | 62.21 ± 27.02   | 12-1900                       | 306.5 ± 555.4  | 306.5 ± 167.5   |
| <b>Thryglobulin</b>                 | 1.74-164  | 35.63 ± 58.04  | 35.63 ± 21.94   | 0.3-405.4                     | 70.27 ± 164.2  | 70.27 ± 67.04   |
| <b>CRP</b>                          | 0-15.4    | 2.846 ± 4.119  | 2.846 ± 1.142   | 0.1-94.8                      | 13.83 ± 23.07  | 13.83 ± 5.595   |
| <b>Height</b>                       | 149-169   | 157.1 ± 6.26   | 157.1 ± 1.565   | 142-168                       | 154.8 ± 5.747  | 154.8 ± 1.394   |
| <b>Weight</b>                       | 43-86     | 69.09 ± 12.16  | 69.09 ± 3.041   | 47.8-112                      | 76.29 ± 16.41  | 76.29 ± 3.981   |
| <b>BSA</b>                          | 1.34-1.99 | 1.729 ± 0.1674 | 1.729 ± 0.04184 | 1.44-2.2                      | 1.802 ± 0.1962 | 1.802 ± 0.04758 |
| <b>BMI</b>                          | 19-36     | 28.19 ± 5.18   | 28.19 ± 1.295   | 20-47                         | 31.87 ± 7.454  | 31.87 ± 1.808   |
| <b>Systolic Blood<br/>Pressure</b>  | 98-148    | 122.1 ± 15.15  | 122.1 ± 3.786   | 114-166                       | 134.6 ± 15.64  | 134.6 ± 3.792   |
| <b>Diastolic Blood<br/>Pressure</b> | 52-84     | 69.69 ± 8.987  | 69.69 ± 2.247   | 50-94                         | 78.18 ± 9.697  | 78.18 ± 2.352   |
| <b>RF</b>                           | -         | -              | -               | 0.01-400<br>(65%<br>Positive) | 98.45 ± 140.2  | 98.45 ± 42.26   |

**Table S3.** Significant correlation analyses between DEGs in NK cells and clinical parameters of healthy controls and RA patients

| <b>Gene Name</b> | <b>Clinical Parameter</b> | <b>P value</b> | <b>r value</b> |
|------------------|---------------------------|----------------|----------------|
| <b>CD56</b>      | WBC                       | 0.0179         | -0.4098        |
|                  | Absolute Lymphocytes      | 0.0391         | -0.3665        |
| <b>PECAM-1</b>   | CRP                       | 0.0167         | 0.4337         |
| <b>ITGB7</b>     | WBC                       | 0.0435         | -0.3536        |
| <b>IBTK</b>      | WBC                       | 0.0138         | -0.4245        |
| <b>TLR10</b>     | Percent Lymphocytes       | 0.0355         | -0.3673        |
| <b>IL12RB2</b>   | Absolute Lymphocytes      | 0.0118         | -0.4399        |
|                  | ESR                       | 0.0368         | -0.3828        |
| <b>CXCR1</b>     | Percent Lymphocytes       | 0.0050         | -0.4770        |
|                  | Absolute Lymphocytes      | 0.0038         | -0.4974        |
| <b>CXCR2</b>     | Percent Lymphocytes       | 0.0158         | -0.4168        |
|                  | Absolute Lymphocytes      | 0.0013         | -0.5427        |
| <b>CXCR6</b>     | Percent Lymphocytes       | 0.0218         | -0.3981        |
|                  | Absolute Lymphocytes      | 0.0272         | -0.3904        |
| <b>CCL2</b>      | ESR                       | 0.0221         | -0.4162        |
|                  | CRP                       | 0.0135         | -0.4459        |
| <b>CCR4</b>      | Percent Lymphocytes       | 0.0417         | -0.3565        |

**Table S4.** Pathways shared by the 11 significant selected genes in Reactome Pathways Option of STRING.

| Description                                        | Observed gene count | Background gene count | False discovery rate | Matching proteins in your network (IDs)                                                                                                                 | Matching proteins in your network (labels)          |
|----------------------------------------------------|---------------------|-----------------------|----------------------|---------------------------------------------------------------------------------------------------------------------------------------------------------|-----------------------------------------------------|
| Immune System                                      | 8                   | 1925                  | 4.60E-05             | ENSP00000225831,E<br>NSP00000263341,ENS<br>P00000267082,ENSP00<br>000308925,ENSP00000<br>384273,ENSP00000457<br>421,ENSP00000480132,<br>ENSP00000483570 | BTK,CCL2,IL1B,ITG<br>B7,NCAM1,PECAM1,<br>RELA,TLR10 |
| Diseases associated with the TLR signaling cascade | 3                   | 24                    | 4.60E-05             | ENSP00000308925,E<br>NSP00000384273,ENS<br>P00000483570                                                                                                 | BTK,RELA,TLR10                                      |
| CLEC7A/inflammasome pathway                        | 2                   | 6                     | 0.00024              | ENSP00000263341,E<br>NSP00000384273                                                                                                                     | IL1B,RELA                                           |
| Interleukin-1 processing                           | 2                   | 7                     | 0.00025              | ENSP00000263341,E<br>NSP00000384273                                                                                                                     | IL1B,RELA                                           |
| Toll-like Receptor Cascades                        | 3                   | 151                   | 0.0015               | ENSP00000308925,E<br>NSP00000384273,ENS<br>P00000483570                                                                                                 | BTK,RELA,TLR10                                      |
| Innate Immune System                               | 5                   | 1012                  | 0.0023               | ENSP00000263341,E<br>NSP00000308925,ENS<br>P00000384273,ENSP00<br>000457421,ENSP00000<br>483570                                                         | BTK,IL1B,PECAM1,<br>RELA,TLR10                      |
| Cytokine Signaling in Immune system                | 4                   | 654                   | 0.0046               | ENSP00000225831,E<br>NSP00000263341,ENS<br>P00000384273,ENSP00<br>000480132                                                                             | CCL2,IL1B,NCAM1,<br>RELA                            |
| Chemokine receptors bind chemokines                | 2                   | 48                    | 0.0046               | ENSP00000293778,E<br>NSP00000332659                                                                                                                     | CCR4,CXCL16                                         |
| Interleukin-10 signaling                           | 2                   | 45                    | 0.0046               | ENSP00000225831,E<br>NSP00000263341                                                                                                                     | CCL2,IL1B                                           |
| Extracellular matrix organization                  | 3                   | 298                   | 0.0059               | ENSP00000267082,E<br>NSP00000457421,ENS<br>P00000480132                                                                                                 | ITGB7,NCAM1,PEC<br>AM1                              |
| MyD88:MAL(TIRAP) cascade                           | 2                   | 94                    | 0.01                 | ENSP00000384273,E<br>NSP00000483570                                                                                                                     | BTK,RELA                                            |

|                                            |   |      |        |                                                                                                 |                                |
|--------------------------------------------|---|------|--------|-------------------------------------------------------------------------------------------------|--------------------------------|
| initiated on plasma membrane               |   |      |        |                                                                                                 |                                |
| Integrin cell surface interactions         | 2 | 83   | 0.01   | ENSP00000267082,E<br>NSP00000457421                                                             | ITGB7,PECAM1                   |
| Signaling by Interleukins                  | 3 | 439  | 0.01   | ENSP00000225831,E<br>NSP00000263341,ENS<br>P00000384273                                         | CCL2,IL1B,RELA                 |
| Interleukin-4 and Interleukin-13 signaling | 2 | 106  | 0.01   | ENSP00000225831,E<br>NSP00000263341                                                             | CCL2,IL1B                      |
| Interleukin-1 signaling                    | 2 | 98   | 0.01   | ENSP00000263341,E<br>NSP00000384273                                                             | IL1B,RELA                      |
| MyD88 cascade initiated on plasma membrane | 2 | 84   | 0.01   | ENSP00000308925,E<br>NSP00000384273                                                             | RELA,TLR10                     |
| Signaling by the B Cell Receptor (BCR)     | 2 | 107  | 0.01   | ENSP00000384273,E<br>NSP00000483570                                                             | BTK,RELA                       |
| Fc epsilon receptor (FCERI) signaling      | 2 | 126  | 0.0108 | ENSP00000384273,E<br>NSP00000483570                                                             | BTK,RELA                       |
| Adaptive Immune System                     | 3 | 733  | 0.0279 | ENSP00000267082,E<br>NSP00000384273,ENS<br>P00000483570                                         | BTK,ITGB7,RELA                 |
| Signal Transduction                        | 5 | 2605 | 0.0373 | ENSP00000293778,E<br>NSP00000332659,ENS<br>P00000384273,ENSP00<br>000480132,ENSP00000<br>483570 | BTK,CCR4,CXCL16,<br>NCAM1,RELA |

Figure S1. Flow chart summarizing the in-silico approach used in the study in order to obtain the DEGs of NK cells in

RA.

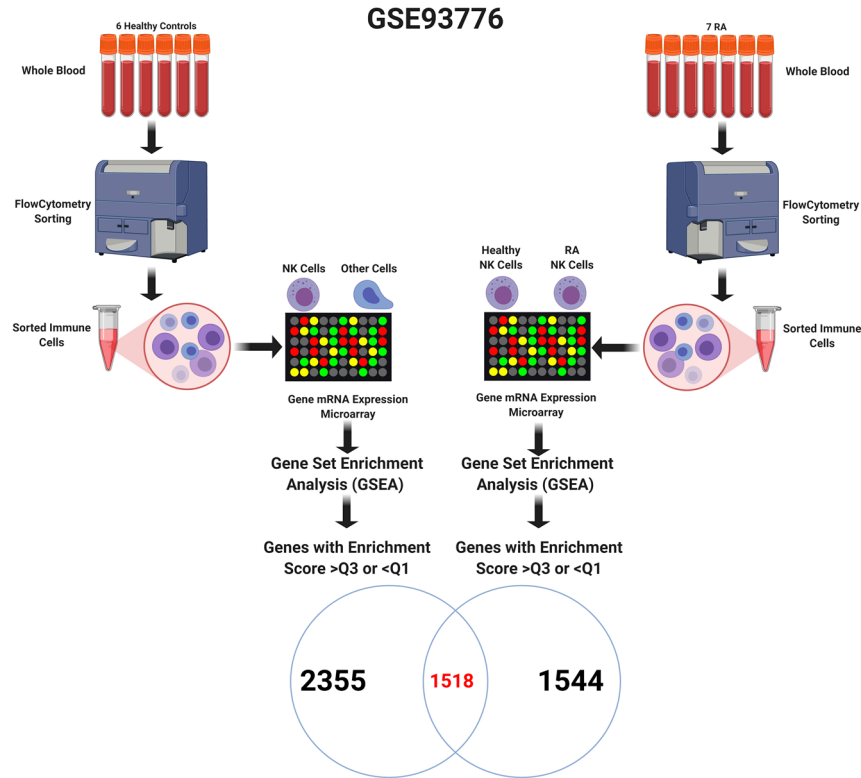

Figure S2. Spearman correlation matrix between each of the DEGs in comparison to the rest of the genes in NK cells of RA patients and healthy controls.

| Genes   | CKLF          | CXCL16       | CD56         | CCR4          | PECAM-1      | IBTK         | ITGB7        | CCL2         | CXCL10        | RELA         | CXCR6        | CXCR1        | CXCR2        | TLR3         | ICAM         | BTK          | IL12RB2      | TLR10        | IL1B         | IFNG          |
|---------|---------------|--------------|--------------|---------------|--------------|--------------|--------------|--------------|---------------|--------------|--------------|--------------|--------------|--------------|--------------|--------------|--------------|--------------|--------------|---------------|
| CKLF    |               | 0.055        | 0.026        | <b>-0.363</b> | -0.217       | 0.319        | 0.105        | 0.153        | -0.278        | <b>0.361</b> | -0.258       | -0.218       | -0.170       | -0.040       | -0.157       | <b>0.461</b> | 0.149        | -0.077       | -0.142       | <b>0.390</b>  |
| CXCL16  | 0.055         |              | 0.147        | 0.016         | <b>0.480</b> | 0.028        | 0.076        | -0.200       | 0.120         | -0.056       | 0.100        | 0.165        | 0.120        | 0.266        | 0.070        | <b>0.611</b> | 0.211        | 0.266        | 0.158        | 0.136         |
| CD56    | 0.026         | 0.147        |              | <b>0.685</b>  | <b>0.507</b> | <b>0.567</b> | <b>0.623</b> | 0.245        | <b>0.691</b>  | 0.286        | <b>0.737</b> | <b>0.755</b> | <b>0.650</b> | <b>0.538</b> | <b>0.619</b> | 0.133        | <b>0.365</b> | <b>0.581</b> | 0.223        | -0.098        |
| CCR4    | <b>-0.363</b> | 0.016        | <b>0.685</b> |               | <b>0.569</b> | 0.095        | 0.255        | <b>0.411</b> | <b>0.884</b>  | -0.189       | <b>0.904</b> | <b>0.899</b> | <b>0.783</b> | <b>0.596</b> | <b>0.771</b> | -0.014       | 0.185        | <b>0.663</b> | <b>0.554</b> | -0.304        |
| PECAM-1 | -0.217        | <b>0.480</b> | <b>0.507</b> | <b>0.569</b>  |              | -0.024       | <b>0.378</b> | -0.048       | <b>0.501</b>  | -0.157       | <b>0.471</b> | <b>0.572</b> | 0.334        | <b>0.455</b> | <b>0.451</b> | <b>0.395</b> | 0.194        | <b>0.566</b> | <b>0.543</b> | -0.162        |
| IBTK    | 0.319         | 0.028        | <b>0.567</b> | 0.095         | -0.024       |              | <b>0.484</b> | 0.111        | 0.249         | <b>0.677</b> | 0.250        | 0.229        | 0.276        | 0.228        | 0.209        | 0.087        | <b>0.398</b> | 0.262        | -0.200       | 0.269         |
| ITGB7   | 0.105         | 0.076        | <b>0.623</b> | 0.255         | <b>0.378</b> | <b>0.484</b> |              | -0.195       | 0.256         | <b>0.452</b> | 0.257        | <b>0.367</b> | 0.080        | 0.295        | 0.311        | 0.121        | 0.285        | 0.334        | 0.212        | 0.246         |
| CCL2    | 0.153         | -0.200       | 0.245        | <b>0.411</b>  | -0.048       | 0.111        | -0.195       |              | <b>0.371</b>  | -0.038       | <b>0.497</b> | <b>0.409</b> | <b>0.648</b> | 0.204        | 0.295        | -0.046       | 0.214        | 0.239        | 0.081        | -0.176        |
| CXCL10  | -0.278        | 0.120        | <b>0.691</b> | <b>0.884</b>  | <b>0.501</b> | 0.249        | 0.256        | <b>0.371</b> |               | -0.019       | <b>0.859</b> | <b>0.766</b> | <b>0.808</b> | <b>0.512</b> | <b>0.755</b> | 0.060        | 0.313        | <b>0.610</b> | <b>0.476</b> | <b>-0.388</b> |
| RELA    | <b>0.361</b>  | -0.056       | 0.286        | -0.189        | -0.157       | <b>0.677</b> | <b>0.452</b> | -0.038       | <b>-0.019</b> |              | -0.130       | -0.157       | -0.075       | 0.021        | -0.032       | -0.022       | 0.338        | -0.071       | -0.332       | 0.222         |
| CXCR6   | -0.258        | 0.100        | <b>0.737</b> | <b>0.904</b>  | <b>0.471</b> | 0.250        | 0.257        | <b>0.497</b> | <b>0.859</b>  | -0.130       |              | <b>0.901</b> | <b>0.904</b> | <b>0.699</b> | <b>0.822</b> | 0.037        | <b>0.366</b> | <b>0.770</b> | <b>0.475</b> | -0.339        |
| CXCR1   | -0.218        | 0.165        | <b>0.755</b> | <b>0.899</b>  | <b>0.572</b> | 0.229        | <b>0.367</b> | <b>0.409</b> | <b>0.766</b>  | -0.157       | <b>0.901</b> |              | <b>0.805</b> | <b>0.657</b> | <b>0.735</b> | 0.124        | 0.244        | <b>0.732</b> | <b>0.531</b> | -0.156        |
| CXCR2   | -0.170        | 0.120        | <b>0.650</b> | <b>0.783</b>  | 0.334        | 0.276        | 0.080        | <b>0.648</b> | <b>0.808</b>  | -0.075       | <b>0.904</b> | <b>0.805</b> |              | <b>0.613</b> | <b>0.743</b> | 0.078        | <b>0.408</b> | <b>0.652</b> | <b>0.363</b> | -0.325        |
| TLR3    | -0.040        | 0.266        | <b>0.538</b> | <b>0.596</b>  | <b>0.455</b> | 0.228        | 0.295        | 0.204        | <b>0.512</b>  | 0.021        | <b>0.699</b> | <b>0.657</b> | <b>0.613</b> |              | <b>0.826</b> | 0.312        | <b>0.489</b> | <b>0.886</b> | <b>0.521</b> | -0.095        |
| ICAM    | -0.157        | 0.070        | <b>0.619</b> | <b>0.771</b>  | <b>0.451</b> | 0.209        | 0.311        | 0.295        | <b>0.755</b>  | -0.032       | <b>0.822</b> | <b>0.735</b> | <b>0.743</b> | <b>0.826</b> |              | 0.112        | <b>0.423</b> | <b>0.872</b> | <b>0.625</b> | -0.324        |
| BTK     | <b>0.461</b>  | <b>0.611</b> | 0.133        | -0.014        | <b>0.396</b> | 0.087        | 0.121        | -0.046       | 0.060         | -0.022       | 0.037        | 0.124        | 0.078        | 0.312        | 0.112        |              | 0.226        | 0.340        | 0.326        | 0.299         |
| IL12RB2 | 0.149         | 0.211        | <b>0.365</b> | 0.185         | 0.194        | <b>0.398</b> | 0.285        | 0.214        | 0.313         | 0.338        | <b>0.366</b> | 0.244        | <b>0.408</b> | <b>0.489</b> | <b>0.423</b> | 0.226        |              | <b>0.599</b> | 0.093        | -0.310        |
| TLR10   | -0.077        | 0.266        | <b>0.581</b> | <b>0.663</b>  | <b>0.566</b> | 0.262        | 0.334        | 0.239        | <b>0.610</b>  | -0.071       | <b>0.770</b> | <b>0.732</b> | <b>0.652</b> | <b>0.886</b> | <b>0.872</b> | 0.340        | <b>0.599</b> |              | <b>0.550</b> | -0.237        |
| IL1B    | -0.142        | 0.158        | 0.223        | <b>0.554</b>  | <b>0.543</b> | -0.200       | 0.212        | 0.081        | <b>0.476</b>  | -0.332       | <b>0.475</b> | <b>0.531</b> | <b>0.363</b> | <b>0.521</b> | <b>0.625</b> | 0.326        | 0.093        | <b>0.550</b> |              | -0.196        |
| IFNG    | <b>0.390</b>  | 0.136        | -0.098       | -0.304        | -0.162       | 0.269        | 0.246        | -0.176       | <b>-0.388</b> | 0.222        | -0.339       | -0.156       | -0.325       | -0.095       | -0.324       | 0.299        | -0.310       | -0.237       | -0.196       |               |
